# Supplementary material for: Determinants of age-related decline in walking speed in older women
Source: PeerJ journal article supplement (doi:10.7717/peerj.14728), 2023-03-07
Supplement: irl-wr-velocity_CART_(1).xlsx.zip [file irl-wr-velocity_CART (1).xlsx]

## Sheet: irl-wr-velocity_CART
individual	age_group	Sex	Age	MUSCLE FORCE	FLEXIBILITY	BALANCE	CARDIORRESPIRATORY FUNCTION	LRI	WR	SSWS	SSWMS
1	1	2	67	18	-13.5	4.34	126	117.45	0.543793	1.89036	2.06186		codebook
2	1	1	60	14	-6	6.6	84	104.58	0.65	1.87149	1.81818		SSWS: spontaneous velocity
3	1	1	69	17	7.5	4.28	87	105.35	0.5861	1.83374	2.32019		SSWMS: maximal velocity
4	1	1	68	19	0	4.9	73	105.47	0.458209	1.82482	1.83824		WR	walking ratio
5	1	1	66	18	25	4.41	98	104.96	0.646016	1.79748	2.14133		LRI	locomotor rehabilitation index
6	1	2	62	13	-22	5.56	70	119.003	0.44761	1.74825	1.72117
7	1	1	68	21	-6	3.37	118	118.899	0.508983	1.74672	1.91205
8	1	1	64	14	3	4.13	101	115.212	0.581317	1.72117	2.04918
9	1	1	66	11	-17	5.1	70	116.116	0.749458	1.68634	1.81818
10	1	1	60	21	2	3.88	123	113.379	0.412975	1.68445	2.14592
11	1	1	65	15	1	4.31	57	112.623	0.560475	1.66389	1.85874
12	1	2	59	22	-22	4.57	78	104.679	0.318071	1.65563	1.14811
13	1	1	66	27	-22.5	3.87	106	112.229	0.625168	1.63934	1.9685
14	1	1	63	20	5	4.13	119	113.967	0.586121	1.63577	2.09644
15	1	1	64	14	25	4.1	110	110.2	0.661691	1.62426	1.90114
16	1	1	66	22	8	4.17	96	110.027	0.661407	1.61638	2.05339
17	1	1	63	14	-1	5.3	97	110.9	0.738129	1.61377	1.8622
18	1	1	65	18	2	5.14	101	104.832	0.706666	1.54879	1.83486
19	1	1	62	19	3	4.16	97	107.851	0.637081	1.54799	1.6835
20	1	2	63	30	2	3.5	120	105.215	0.537896	1.53689	2.12314
21	1	2	69	22	-1	4.61	104	108.94	0.584795	1.52594	1.54083
22	1	1	68	17	-13.5	4.47	56	106.261	0.552767	1.52517	1.76991
23	1	1	66	17	7	5.33	85	103.961	0.738373	1.50981	2.06186
24	1	1	66	18	-10	4.49	96	101.065	0.525261	1.5015	1.89753
25	1	1	69	19	6	4.76	89	101.9	0.514237	1.48478	1.6835
26	1	1	67	23	15	4.53	109	99.8652	0.618973	1.48368	2.12314
27	1	1	63	13	-8	5.11	104	100.963	0.481714	1.45773	1.84162
28	1	2	62	15	0	4.5	86	94.5117	0.669632	1.45773	1.9305
29	1	1	66	18	6	4.29	97	92.92	0.526227	1.44788	1.83824
30	1	1	66	13	10	5.2	68	100.74	0.533651	1.4218	2.46914
31	1	1	67	22	-8	5.83	82	105.341	0.927692	1.41911	1.95695
32	1	1	64	17	0	4.84	102	96.0985	0.564404	1.41176	1.93798
33	1	1	62	19	-9	4.41	99	97.2761	0.527407	1.40449	1.76991
34	1	1	67	20	14	4.26	99	93.8388	0.591071	1.40187	1.8315
35	1	1	66	15	-12	4.85	53	99.1385	0.545588	1.3973	1.77305
36	1	1	68	10	-7.5	5.1	74	94.6289	0.508511	1.39018	1.85529
37	1	1	66	6	-1	6.9	58	95.444	0.599897	1.37804	1.79533
38	1	1	69	15	1	4.65	80	97.6377	0.602617	1.37615	1.76056
39	1	2	61	20	-20	4.01	96	89.6632	0.587651	1.36861	1.87266
40	1	1	61	12	-13	5.1	110	94.4033	0.60651	1.36302	1.82482
41	1	1	68	6	-20	5.53	64	90.6585	0.519115	1.36178	1.74825
42	1	1	61	13	-9	5.1	75	93.3012	0.546864	1.3471	2.06186
43	1	1	68	29	-8	4.38	94	97.59	0.699408	1.34108	1.9305
44	1	1	69	19	-5	4.83	55	95.4441	0.564763	1.3369	1.90476
45	1	1	66	17	-2	4.23	118	91.4027	0.552769	1.32743	2.20751
46	1	1	65	15	-4	6.25	90	90.3181	0.897746	1.32685	2.15054
47	1	1	66	16	-1.5	4.35	83	88.4096	0.589432	1.31349	1.72414
48	1	1	60	18	-11	5.3	92	90.9727	0.864703	1.31349	2.03252
49	1	1	68	15	12	4.26	95	92.022	0.673073	1.31291	1.93424
50	1	1	62	20	-3	4.24	94	90.2	0.575334	1.31234	1.60514
51	1	2	69	16	-21	4.81	114	90.7313	0.559881	1.31	1.6835
52	1	1	68	13	-16.5	4.75	81	88.669	0.592281	1.31	1.6835
53	1	1	68	11	-8	5.41	70	92.9446	0.592281	1.31	1.6835
54	1	1	64	14	-17	4.79	70	91.818	0.609672	1.31	1.6835
55	1	1	62	16	0	6.2	87	89.68	0.552853	1.31	2.11864
56	1	1	68	22	15	3.65	105	88.17	0.61189	1.31	2.44499
57	1	1	60	14	-13	3.58	87	86.74	0.500794	1.31	2.47525
58	1	1	68	19	4	4.6	90	87.7315	0.633253	1.2815	1.80505
59	1	1	64	24	2	4.43	97	87.6566	0.56432	1.28041	1.88324
60	1	2	62	23	-19	4.3	129	85.4532	0.566573	1.2766	1.79211
61	1	1	59	21	-5	4.74	75	88.305	0.566728	1.27497	1.7331
62	1	1	68	16	0	5.59	86	85.283	0.623219	1.25997	1.65289
63	1	1	67	16	4	4.78	101	85.0433	0.50194	1.24224	1.61812
64	1	1	64	19	0	3.75	102	81.7984	0.481823	1.222	1.81818
65	1	1	67	20	4.5	4.93	73	86.1393	0.556288	1.21408	1.71527
66	1	1	67	12	-5	5.51	86	82.798	0.613793	1.19546	1.6835
67	1	1	65	12	-21.5	7.19	86	81.274	0.558974	1.18718	1.31579
68	1	1	65	19	-3	5.12	78	80.56	0.501025	1.17325	1.59236
69	1	1	62	16	-26	5.54	96	79.8184	0.546008	1.1592	1.52439
70	1	1	66	14	1	4.63	90	81.3675	0.599234	1.11815	1.52439
71	1	2	66	21	-2	4.1	112	73.7357	0.915073	1.11359	2.5
72	1	1	64	19	2	5.7	98	77.9645	0.596578	1.11235	1.6835
73	1	1	67	12	-12	6.3	95	73.451	0.71315	1.09729	2.457
74	1	1	68	30	0	4.82	92	73.5084	0.615918	1.0921	1.80832
75	1	1	69	17	13	5.65	102	75.2387	0.670389	1.06045	1.25786
76	1	1	64	17	-11	4.51	86	72.9059	0.558507	1.05263	1.56006
77	1	1	63	15	-4	5.69	58	70.4109	0.56379	0.980072	1.30719
78	1	1	68	9	-3	7.48	86	68.3139	0.563865	0.974659	1.19474
79	1	1	68	17	-2	4.86	98	64.6168	0.647205	0.96	1.4556
80	1	1	66	19	0	5.13	115	67.3078	0.730049	0.954502	1.75439
81	1	1	59	13	-16	5.87	55	68.0542	0.519224	0.947269	1.20337
82	1	1	66	25	-1	4.63	97	64.8782	0.983265	0.92564	2.29358
83	1	1	61	23	-7	4.59	92	61.0882	0.780988	0.866301	2.12314
84	2	1	79	21	4	4.93	66	120.731	0.598121	1.75336	2.04499
85	2	1	71	17	11	3.45	79	117.025	0.532081	1.7094	2.27273
86	2	1	72	18	-20	4.41	86	114.918	0.523436	1.68824	2.11864
87	2	1	70	15	8	4.73	89	112.203	0.6933	1.68539	2.18341
88	2	2	71	16	-12	5.5	94	118.581	0.64494	1.68161	1.95695
89	2	2	77	15	-18	5.3	81	110.465	0.463261	1.65929	1.54321
90	2	2	76	23	0	3.88	122	110.689	0.416844	1.63532	1.6835
91	2	2	76	11	0	5.3	71	109.361	0.51272	1.59744	1.48368
92	2	1	77	10	3	5.84	68	109.936	0.711373	1.59659	1.8622
93	2	2	77	13	-19	5.53	87	104.385	0.560478	1.57646	2.35849
94	2	1	72	12	-27	6.4	81	103.893	0.655155	1.56904	1.93424
95	2	1	70	18	-9	5.97	80	111.39	0.351273	1.5674	1.6835
96	2	1	79	13	-16	5.4	90	105.485	0.689635	1.55844	2.1097
97	2	1	72	14	9.5	5.54	100	101.994	0.532936	1.55119	1.77305
98	2	1	74	14	-4	5.3	96	107.132	0.518189	1.53767	1.43266
99	2	1	77	20	-20	4.67	98	105.89	0.62543	1.53296	2.11416
100	2	1	77	15	-2	5.57	78	105.419	0.525792	1.52207	1.83486
101	2	1	73	22	-5	5.19	86	105.964	0.541643	1.52091	1.6835
102	2	1	73	22	18	4.84	113	109.483	0.604946	1.50451	1.52905
103	2	1	78	17	-4	5.26	97	103.89	0.502599	1.50225	1.72117
104	2	1	72	15	0	4.44	83	99.1498	0.586054	1.46484	1.84502
105	2	1	74	13	2	5.92	87	97.6252	0.513332	1.45843	1.96078
106	2	1	74	16	5	4.8	94	98.6201	0.594876	1.45702	1.56986
107	2	1	74	17	18	4.67	86	93.9075	0.508943	1.44092	1.98413
108	2	1	71	21	0	4.03	110	101.698	0.582161	1.4245	2.14592
109	2	1	78	13	-25	5.28	68	99.0592	0.598776	1.4218	1.97239
110	2	1	71	14	13	4.62	97	93.4355	0.544741	1.4111	1.83824
111	2	1	75	12	13	5.53	86	96.3545	0.643628	1.40746	1.6835
112	2	2	73	15	-28	6.13	73	90.5946	0.719255	1.40449	2.14592
113	2	1	73	13	0	4.73	77	99.3235	0.613239	1.39991	1.81818
114	2	1	77	12	2	4.9	88	97.8001	0.575919	1.39535	1.93424
115	2	1	76	18	0	5.6	88	101.75	0.671611	1.38313	1.59236
116	2	1	72	14	-7	6.3	73	94.2973	0.463822	1.37741	1.36426
117	2	1	70	30	5	4.27	115	95.0076	0.812694	1.37174	2
118	2	1	71	29	0	4.15	103	102.759	0.56122	1.3655	1.68919
119	2	1	76	20	-14	5.43	95	97.3087	0.475881	1.36302	1.7452
120	2	1	78	11	0	5.67	87	93.4771	0.522079	1.34168	1.77305
121	2	1	70	15	3	4.51	68	92.1427	0.551546	1.33038	1.79211
122	2	1	76	14	-26	5.23	93	90.3631	0.548742	1.31234	1.73611
123	2	1	75	21	0	4.52	108	93.0696	0.545578	1.31176	1.72117
124	2	2	71	16	-15	5.34	60	90.73	0.463388	1.31	1.74
125	2	1	74	12	-1	4.2	86	87.6892	0.559881	1.31	1.6835
126	2	1	74	19	20	4.29	128	88.669	0.603781	1.31	1.6835
127	2	1	72	15	-8	5.41	84	91.818	0.640616	1.31	1.6835
128	2	2	76	16	0	8.14	70	87.6892	0.873834	1.31	1.6835
129	2	2	75	17	-8	4.37	80	89.9696	0.583452	1.30662	1.82149
130	2	1	77	16	-10	4.57	98	90.57	0.455036	1.30435	1.83824
131	2	1	77	17	-5	6.41	70	90.4777	0.52603	1.29088	1.55763
132	2	1	74	12	0	4.84	117	86.1148	0.609589	1.27226	1.80505
133	2	1	73	18	10	4.31	97	85.5806	0.530433	1.27146	1.6835
134	2	1	72	12	10	5.1	102	89.4705	0.743805	1.26103	1.92678
135	2	1	72	17	4	5.3	56	83.4952	0.482028	1.25418	1.69492
136	2	2	74	14	-20	4.8	99	81.2808	0.581892	1.25366	2.12314
137	2	1	73	20	0	4.76	92	91.1139	0.575147	1.25209	1.65563
138	2	2	72	17	11	3.7	101	87.1258	0.597	1.25052	1.66667
139	2	1	71	22	16	5.2	76	90.9241	0.68399	1.24948	1.51286
140	2	1	75	20	0	8.28	55	86.9446	0.701284	1.24792	1.79856
141	2	1	71	21	-1	5.19	65	85.5363	0.987421	1.24224	2.45098
142	2	2	75	14	-28	4.7	73	84.3143	0.526517	1.23865	2.03666
143	2	1	73	16	-10	6	86	91.9068	0.500903	1.23813	1.42653
144	2	1	70	14	0	4.5	86	85.3663	0.53407	1.23254	1.78891
145	2	1	70	15	5	4.71	120	88.9684	0.654339	1.23052	1.43266
146	2	1	70	16	0	5.59	79	82.9488	0.563014	1.22549	1.73611
147	2	1	79	8	-5	5.93	79	83.04	0.4566	1.21655	1.49477
148	2	2	70	12	-15	4.84	85	85.4396	0.50811	1.21163	1.65563
149	2	1	79	18	5	4.4	125	81.5539	0.695204	1.21163	1.74216
150	2	1	70	19	-9	5.31	80	88.7642	0.52303	1.20385	1.51057
151	2	1	70	15	0	4.75	86	85.8767	0.580977	1.20289	1.57729
152	2	1	78	12	-10	6.24	77	81.8474	0.479445	1.2024	1.54083
153	2	1	77	16	-18	5.65	89	83.11	0.48693	1.1957	1.40056
154	2	1	75	18	6	5.4	97	84.6997	1.01743	1.19379	2.41546
155	2	1	79	9	-6	6.18	56	79.3802	0.492991	1.19237	1.46199
156	2	1	74	18	-8	5.5	87	86.03	0.496424	1.19095	1.64204
157	2	1	72	17	-2	4.5	107	80.9712	0.537079	1.18953	1.57978
158	2	1	79	20	2	5.18	100	85.4293	0.524883	1.18157	1.62338
159	2	1	79	15	-27	5.88	88	79.4677	0.467677	1.18064	1.5748
160	2	2	79	9	-3	8.48	53	76.9846	0.5045	1.17509	1.50602
161	2	1	79	11	-9	7.55	62	78.6322	0.557292	1.16822	1.34409
162	2	2	70	12	-14	6.1	92	76.0761	0.544386	1.16732	1.48148
163	2	1	76	12	-8	5.41	55	82.5001	0.536165	1.16279	1.67224
164	2	1	78	14	3	5.45	86	80.5355	0.649327	1.16279	1.6835
165	2	1	70	23	10	5.06	103	80.442	0.594063	1.16144	1.52905
166	2	1	72	14	5	5.29	89	77.9796	0.562496	1.15207	1.5748
167	2	1	73	20	14	4.64	92	81.6144	0.675773	1.15031	1.70648
168	2	1	70	13	0	6.1	76	77.6166	0.55508	1.14025	1.36612
169	2	1	70	17	-3	5.15	84	76.5682	0.629936	1.13122	1.63666
170	2	2	74	20	-5	3.91	94	74.4618	0.53555	1.13058	1.71527
171	2	1	73	17	-7	4.22	96	74.9869	0.737953	1.12024	1.79211
172	2	1	71	13	-5	5.35	82	77.6765	0.545506	1.10824	1.38889
173	2	1	76	14	0	5.7	75	79.209	0.525252	1.10254	1.52672
174	2	2	72	12	-10	5.2	112	70.0919	0.37253	1.08108	1.1325
175	2	1	78	14	0	4.06	92	75.3387	0.498716	1.07488	1.6835
176	2	1	70	18	-6	4.78	82	74.2379	0.484811	1.03986	1.48368
177	2	1	75	12	0	5.6	86	71.0612	0.473227	1.01386	1.38696
178	2	1	70	16	-2	3.88	86	72.1862	0.675699	1.01112	1.57233
179	2	1	70	17	-13	5.6	82	68.0387	0.679528	0.976562	1.68634
180	2	1	75	14	-25	5.06	62	67.5493	0.522527	0.975293	1.23916
181	2	1	77	29	-5	4.62	93	67.4178	0.464566	0.973394	1.69779
182	2	2	77	12	-19	6.43	86	61.9193	0.481728	0.940144	1.32275
183	2	1	72	11	-19.5	6.26	86	62.2489	0.442216	0.929944	1.11483
184	2	1	74	10	-18	5.03	93	60.1229	0.502021	0.917712	1.42653
185	2	1	75	12	-22.5	6.44	61	64.5196	0.512553	0.909366	1.21065
186	2	1	77	11	-10	8.66	59	60.7861	0.57363	0.824402	0.948767
187	2	1	76	10	-22	6.68	54		0.5	0.772599	0.940734
188	3	2	85	22	-20	3.78	115	113.984	0.334641	1.82039	2.38095
189	3	1	80	18	-9	4.3	82	112.925	0.628584	1.63043	1.87617
190	3	2	82	17	-9	5.6	56	107.99	0.484528	1.58646	1.89753
191	3	1	85	8	4	5.3	93	107.477	0.566147	1.56087	1.46413
192	3	1	83	10	0	4.9	96	107.049	0.560784	1.5456	1.6835
193	3	1	82	18	-4	4.33	92	103.108	0.560087	1.47638	1.88324
194	3	1	81	18	-3	5.7	99	96.3277	0.597506	1.42315	1.5528
195	3	1	87	10	-17	5.34	69	100.355	0.915571	1.42315	2.03666
196	3	1	86	14	0	5.9	77	101.505	0.537431	1.4218	2.73973
197	3	1	80	16	-7.5	5.07	86	91.3279	0.495092	1.34168	1.73913
198	3	2	86	8	4	7.1	110	87.8935	0.498866	1.33452	1.74825
199	3	1	80	8	12	6.28	86	91.42	0.445105	1.31521	1.78571
200	3	1	80	16	-5	6.8	90	91.4326	0.67998	1.31234	1.93424
201	3	2	89	15	-25	6.4	85	89.78	0.582108	1.31	1.51745
202	3	2	84	19	-14	4.26	68	89.6824	0.565073	1.31	1.6835
203	3	1	82	10	0	4.35	79	88.669	0.586667	1.31	1.6835
204	3	1	80	21	-2	3.91	105	90.7143	0.563231	1.27065	2.04918
205	3	1	88	20	-10	6.67	86	90.96	0.485465	1.26422	1.45773
206	3	2	81	7	-27	6.67	55	75.6199	0.552356	1.22499	1.52439
207	3	1	83	18	0	5.38	86	85.5452	0.55112	1.2205	1.65837
208	3	1	81	16	0	8.85	55	83.4627	0.611111	1.21212	1.13507
209	3	2	85	16	10	6.59	90	76.5649	0.458079	1.19904	1.62866
210	3	1	80	13	5	4.79	95	79.6558	0.638001	1.18343	1.43472
211	3	1	82	12	-12	6.36	60	83.0417	0.538203	1.14855	1.48148
212	3	1	83	12	-11	5.25	128	77.9127	0.520894	1.1446	1.60256
213	3	1	82	19	3	4.87	99	82.9441	0.5638	1.13982	1.5873
214	3	1	82	20	-1	4.84	92	78.1198	0.464385	1.10783	1.74216
215	3	1	86	22	-3	4.89	98	74.4078	0.567202	1.0993	1.75747
216	3	1	84	10	-6	7.22	80	74.3841	0.360241	1.05485	1.36799
217	3	1	84	13	-29	5.87	86	73.7874	0.496712	1.04639	1.5456
218	3	1	84	12	-25	6.66	86	71.5314	0.516946	1.02669	1.33156
219	3	1	88	10	-29	7.63	69	70.5416	0.354006	1.01249	1.10619
220	3	1	86	9	-22	7.7	86	68.0379	0.526291	0.941029	1.10375
221	3	2	84	12	-5	5.34	78	64.0054	0.352739	0.940291	1.6835
222	3	1	87	12	-25	6.84	93	60.7727	0.516327	0.87745	1.21359
223	3	1	80	17	-24	6.81	83	63.3669	0.507353	0.876424	1.11359
224	3	1	86	9	-18	8.33	53	64.7258	0.641436	0.866051	1.6835
225	3	1	84	13	-5	6.7	94		0.80517	0.824176	2
226	3	1	91	10	9	6.82	83	81.1078	0.509838	1.16414	1.35685
227	3	1	97	12	0	5.35	50	68.0851	0.562402	0.988794	1.21655
228	3	1	94	11	0	7.75	64	66.9277	0.475921	0.988794	1.31579
